# Supplementary material
Source: Elsevier journal article supplement (https://www.sciencedirect.com/science/article/pii/S2173578622000038)
Supplement: mmc1 [file S2173578622000038:mmc1.docx]

**Appendix 1. Questionnaire**

1. Age?............. Gender?............
2. In which geographic location are you working/did you work?
3. Monthly income? …….
4. How many night calls do/did u have per month?
5. Do/did you work more than 80 hours per week? a.yes b.no
6. Which type of hospital are u working/did you work in? a-GBTRH b- UH
7. The reason why you selected your training hospital? a- No reason b- More practice c-Better education d- More income e- City preference f- Academic purpose
8. Durations of your rotations in ….. a- Inpatient clinic b- Outpatient clinic c- Operating room
9. Which skills laboratory do you have/did you have in your clinic? ………
10. Which didactic education hours do you have/did you have in your clinic routinely? a-Literature review b- Uro council c- Multidisciplinary council d- Theoretical training presentations
11. Do you have/did you have a logbook in your clinic? Did deficiencies complete according to the logbook records? a.yes b.no a.yes b.no
12. which of these procedures do you feel capable of performing as primary surgeon/unsupervised? a- Endourology b- Open major surgery c- Laparoscopy d- Robotics e- Functional urology
13. Which subspecialty do you want to pursuit in the future? a- Endourology b-Oncology c- Laparoscopy d- Robotics e- Functional urology f- Pediatric urology g-Andrology
14. How many publications do u have? First author: Any author:
15. How many abstracts did you present during congress? First author: Any author:
16. What kind of method do/did you use for your medical thesis? a- Retrospective cohort b-Prospective cohort c- Animal study d- Cross-Sectional
17. What are your career plans for the future? a-Not have yet b- Academic Practice c- Fellowship abroad d-Fellowship national e- Private Practice
18. Have you ever participated in online education while your residency? a.yes b.no
19. Which type of online education have you participated in? a-e-Courses b-Webinars c-Surgical education
20. Do you find the online educations which you attended beneficial? ( separately) a-disagree b-agree c-strongly agree
21. Are you satisfied being a Urology specialist? a.yes b.no
22. Do you have any bad opinion/unsatisfied factor for urology specialty?......
